# Supplementary material
Source: ML conference proceedings conference paper supplement (https://openaccess.thecvf.com/content/CVPR2024/html/Niedermayr_Compressed_3D_Gaussian_CVPR_2024_paper.html)
Supplement: Supplementary file 1 [file Niedermayr_Compressed_3D_Gaussian_CVPR_2024_supplemental.pdf]

# Compressed 3D Gaussian Splatting for Accelerated Novel View Synthesis

## Supplementary Material

### 8. Supplementary

#### A. Detailed Scene Analysis

For all scenes used in the paper, we report the PSNR, SSIM, LPIPS, memory consumption, and compression ratio of our approach. See Tab. 8 for Mip-Nerf360 [2], Tab. 10 for Deep Blending [9], Tab. 9 for Tanks&Temples [14], Tab. 11 for the synthetic scenes from [16].

#### B. Image Quality

For all scenes used in the paper, a random test view is selected. The ground truth images are compared to the renderings of the uncompressed (baseline) and our compressed (Compressed) scene representation. See Figs. 11 and 12 for Mip-Nerf360 [2], Fig. 10 for Deep Blending [9], Fig. 9 for Tanks & Temples [14], Figs. 13 and 14 for the synthetic scenes from [16].

#### C. Memory Requirements

Fig. 7 illustrates the memory requirements of different scene parameters. The coordinates of the 3D Gaussian center points and the codebook indices take up the most memory in general. The amount of memory required by the color codebook varies significantly between different scenes.

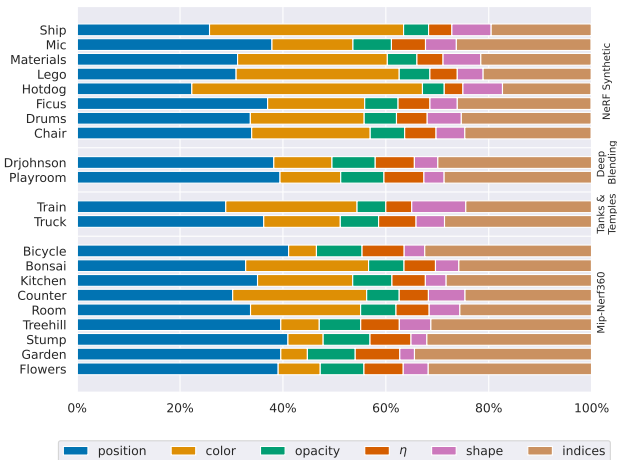

Figure 7. Storage size of different scene parameters in the compressed representation. Color is the codebook with all SH coefficients. Shape is the codebook with the Gaussian parameters and  $\eta$  is the scaling factor.

#### D. Timing Statistics

We provide timings for the different stages of our compression pipeline. Tab. 6 shows the average and maximum time

required by each stage. It can be seen that the fine-tuning stage takes up 70% of the total time.

|                         | Average Time ↓ | Maximum Time ↓ |
|-------------------------|----------------|----------------|
| Sensitivity Calculation | 8.05           | 11.38          |
| Clustering              | 75.11          | 78.41          |
| QA Fine-tuning          | 213.30         | 278.05         |
| Encoding                | 2.69           | 5.13           |
| Total                   | 299.15         | 365.94         |

Table 6. Time requirements of the individual stages of the compression pipeline. We report the average and maximum time of each stage in seconds. The entropy and run-length encoding are grouped into the Encoding stage. Measurements were taken with an NVIDIA RTX A5000 graphics card.

Additionally, we report timings for each stage of the novel view renderer. Tab. 7 shows the average times for two different scenes. It can be seen that the preprocessing stage is accelerated by a factor of  $5\times$  when using the compressed scene representation.

|         |              | Preprocess ↓ | Sorting ↓ | Rasterization ↓ | Total ↓ |
|---------|--------------|--------------|-----------|-----------------|---------|
| Bicycle | Uncompressed | 1.46         | 0.55      | 2.81            | 4.82    |
|         | Compressed   | 0.28         | 0.48      | 2.45            | 3.22    |
| Bonsai  | Uncompressed | 0.44         | 0.20      | 1.81            | 2.44    |
|         | Compressed   | 0.09         | 0.19      | 1.67            | 1.95    |

Table 7. Timings in milliseconds for the different stages of our renderer. Evaluated on an NVIDIA RTX A5000 with scenes from Mip-Nerf360 [2]

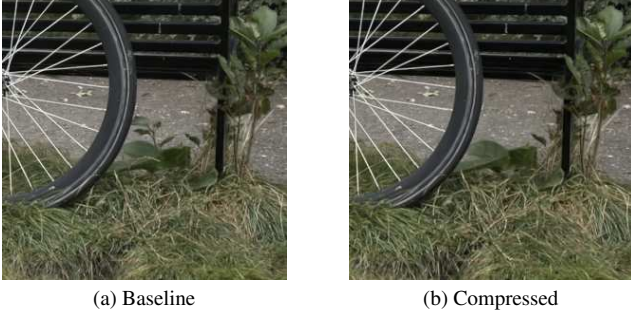

Figure 8. Pruning failure case. Compared to the baseline reconstruction, some leaves have been removed in the compressed version due to pruning.

### E. Sensitivity Calculation and Pruning

The sensitivity of a parameter is calculated using the gradient of the total image energy wrt. this parameter (see Eq. (3)). Kerbl *et al.* [13] clamp negative direction-dependent colors (i.e., resulting from the evaluation of the SH coefficients) to zero. For the clamped values, the partial derivatives are set to zero in the backward pass. This results in a sensitivity of zero for the respective SH coefficients, which is not desired since they possibly contribute to the training images. Therefore, we do not clamp colors when calculating the sensitivity.

We observe that a notable number of Gaussians (up to 15%) do not have any impact on the training images. These particular splats exhibit zero sensitivity in the color parameters. Consequently, we opt to eliminate these splats from the scene (called Pruning in Tab. 3).

Experiments with higher pruning thresholds have shown that more Gaussians can be removed with minimal loss in PSNR. However, this can lead to fine details in the scene being removed, which we consider undesirable. An example of this can be seen in Fig. 8, where small leaves were removed from the reconstruction due to pruning.

### F. Covariance Matrix Clustering

Given a rotation matrix  $R \in \mathbb{R}^{3 \times 3}$  and a scaling vector  $\mathbf{s} \in \mathbb{R}_{>0}^3$ . The covariance matrix  $\Sigma$  is defined as [13]

$$\Sigma = R S S R^T = R S^2 R^T, \quad (8)$$

with  $S = \text{diag}(\mathbf{s})$ . Since  $\Sigma$  is real and symmetric it holds that

$$S^2 = \text{diag}([\lambda_1, \lambda_2, \lambda_3]^T) = \text{diag}([s_1^2, s_2^2, s_3^2]^T), \quad (9)$$

where  $\lambda_i$  are the eigenvalues of  $\Sigma$ . By using the trace of  $\Sigma$ , the squared length of  $\mathbf{s}$  can be calculated as

$$\text{Tr}(\Sigma) = \sum_{i=1}^3 \lambda_i = \sum_{i=1}^3 s_i^2 = \|\mathbf{s}\|_2^2 \quad (10)$$

**Clustering Update Step** In the following, we show that the clustering update step results in normalized covariance matrices as cluster centroids. Given  $N$  normalized covariance matrices  $\hat{\Sigma}_i$  with  $\|\mathbf{s}_i\|_2 = 1$  and respective weighting factors  $w_i \in \mathbb{R}_{>0}$ . Their centroid  $\hat{\Sigma}_c$  is calculated as

$$\hat{\Sigma}_c = \frac{1}{\sum_{i=1}^N w_i} \sum_{i=1}^N w_i \hat{\Sigma}_i \quad (11)$$

. By using Eq. (10) it holds that

$$\|\mathbf{s}_c\|_2^2 = \text{Tr}(\hat{\Sigma}_c) \quad (12)$$

$$= \text{Tr}\left(\frac{1}{\sum_{i=1}^N w_i} \sum_{i=1}^N w_i \hat{\Sigma}_i\right) \quad (13)$$

$$= \frac{1}{\sum_{i=1}^N w_i} \sum_{i=1}^N w_i \text{Tr}(\hat{\Sigma}_i) \quad (14)$$

$$= \frac{1}{\sum_{i=1}^N w_i} \sum_{i=1}^N w_i \|\mathbf{s}_i\|_2^2 \quad (15)$$

$$= 1 \quad (16)$$

This proves that the covariance matrix  $\hat{\Sigma}_c$  has a normalized scaling vector and thus itself is in a normalized form.

**Covariance Matrix Normalization** The following derivation proves that a covariance matrix  $\Sigma$  can be transformed into its normalized form  $\hat{\Sigma}$  by dividing it by its trace, i.e.,

$$\frac{\Sigma}{\text{Tr}(\Sigma)} = R \frac{S^2}{\text{Tr}(\Sigma)} R^T = R \frac{S}{\|\mathbf{s}\|_2} \frac{S}{\|\mathbf{s}\|_2} R^T \quad (17)$$

$$= R \hat{S}^2 R^T = \hat{\Sigma} \quad (18)$$

| Scene    | 3D Gaussian Splatting |                 |                    |                   | Ours            |                 |                    |                   | Ratio $\uparrow$ |
|----------|-----------------------|-----------------|--------------------|-------------------|-----------------|-----------------|--------------------|-------------------|------------------|
|          | PSNR $\uparrow$       | SSIM $\uparrow$ | LPIPS $\downarrow$ | SIZE $\downarrow$ | PSNR $\uparrow$ | SSIM $\uparrow$ | LPIPS $\downarrow$ | SIZE $\downarrow$ |                  |
| bicycle  | 25.171                | 0.762           | 0.216              | 1450.277          | 24.970          | 0.751           | 0.240              | 47.147            | 30.761           |
| bonsai   | 31.979                | 0.938           | 0.208              | 294.415           | 31.347          | 0.930           | 0.217              | 12.794            | 23.011           |
| counter  | 28.888                | 0.905           | 0.204              | 289.244           | 28.671          | 0.896           | 0.215              | 13.789            | 20.977           |
| flowers  | 21.448                | 0.602           | 0.341              | 860.062           | 21.152          | 0.584           | 0.358              | 31.140            | 27.619           |
| garden   | 27.179                | 0.861           | 0.115              | 1379.993          | 26.746          | 0.844           | 0.144              | 46.565            | 29.636           |
| kitchen  | 30.713                | 0.923           | 0.130              | 438.099           | 30.262          | 0.914           | 0.140              | 18.874            | 23.211           |
| room     | 31.341                | 0.916           | 0.223              | 376.853           | 31.138          | 0.911           | 0.231              | 15.033            | 25.068           |
| stump    | 26.562                | 0.770           | 0.219              | 1173.522          | 26.285          | 0.757           | 0.250              | 40.569            | 28.926           |
| treehill | 22.303                | 0.631           | 0.328              | 894.903           | 22.256          | 0.620           | 0.351              | 33.318            | 26.859           |
| average  | 27.287                | 0.812           | 0.220              | 795.263           | 26.981          | 0.801           | 0.238              | 28.803            | 26.230           |

Table 8. Mip-Nerf360 [2] results.

| Scene   | 3D Gaussian Splatting |                 |                    |                   | Ours            |                 |                    |                   | Ratio $\uparrow$ |
|---------|-----------------------|-----------------|--------------------|-------------------|-----------------|-----------------|--------------------|-------------------|------------------|
|         | PSNR $\uparrow$       | SSIM $\uparrow$ | LPIPS $\downarrow$ | SIZE $\downarrow$ | PSNR $\uparrow$ | SSIM $\uparrow$ | LPIPS $\downarrow$ | SIZE $\downarrow$ |                  |
| train   | 21.770                | 0.805           | 0.217              | 242.782           | 21.863          | 0.798           | 0.226              | 13.249            | 18.324           |
| truck   | 24.940                | 0.871           | 0.155              | 601.030           | 24.823          | 0.867           | 0.161              | 21.316            | 28.196           |
| average | 23.355                | 0.838           | 0.186              | 421.906           | 23.343          | 0.832           | 0.194              | 17.282            | 23.260           |

Table 9. Tanks&Temples [14] results

| Scene     | 3D Gaussian Splatting |                 |                    |                   | Ours            |                 |                    |                   | Ratio $\uparrow$ |
|-----------|-----------------------|-----------------|--------------------|-------------------|-----------------|-----------------|--------------------|-------------------|------------------|
|           | PSNR $\uparrow$       | SSIM $\uparrow$ | LPIPS $\downarrow$ | SIZE $\downarrow$ | PSNR $\uparrow$ | SSIM $\uparrow$ | LPIPS $\downarrow$ | SIZE $\downarrow$ |                  |
| drjohnson | 28.938                | 0.896           | 0.248              | 805.358           | 28.871          | 0.895           | 0.254              | 28.938            | 27.830           |
| playroom  | 29.926                | 0.901           | 0.244              | 602.186           | 29.891          | 0.900           | 0.252              | 21.660            | 27.802           |
| average   | 29.432                | 0.898           | 0.246              | 703.772           | 29.381          | 0.898           | 0.253              | 25.299            | 27.816           |

Table 10. Deep Blending [9] results

| Scene     | 3D Gaussian Splatting |                 |                    |                   | Ours            |                 |                    |                   | Ratio $\uparrow$ |
|-----------|-----------------------|-----------------|--------------------|-------------------|-----------------|-----------------|--------------------|-------------------|------------------|
|           | PSNR $\uparrow$       | SSIM $\uparrow$ | LPIPS $\downarrow$ | SIZE $\downarrow$ | PSNR $\uparrow$ | SSIM $\uparrow$ | LPIPS $\downarrow$ | SIZE $\downarrow$ |                  |
| chair     | 35.864                | 0.987           | 0.012              | 70.105            | 35.297          | 0.985           | 0.014              | 3.575             | 19.609           |
| drums     | 26.072                | 0.954           | 0.038              | 83.665            | 25.941          | 0.952           | 0.040              | 3.829             | 21.848           |
| figus     | 34.736                | 0.987           | 0.012              | 70.177            | 34.559          | 0.986           | 0.013              | 3.059             | 22.937           |
| hotdog    | 37.646                | 0.985           | 0.021              | 34.079            | 37.367          | 0.984           | 0.022              | 2.725             | 12.505           |
| lego      | 35.399                | 0.981           | 0.017              | 76.071            | 34.802          | 0.979           | 0.020              | 4.314             | 17.633           |
| materials | 29.861                | 0.959           | 0.035              | 71.833            | 29.602          | 0.957           | 0.038              | 4.021             | 17.862           |
| mic       | 35.155                | 0.991           | 0.006              | 77.563            | 34.913          | 0.991           | 0.007              | 3.025             | 25.640           |
| ship      | 30.954                | 0.905           | 0.111              | 75.659            | 31.005          | 0.905           | 0.111              | 4.938             | 15.322           |
| average   | 33.211                | 0.969           | 0.031              | 69.894            | 32.936          | 0.967           | 0.033              | 3.686             | 19.170           |

Table 11. NeRF Synthetic [16] results

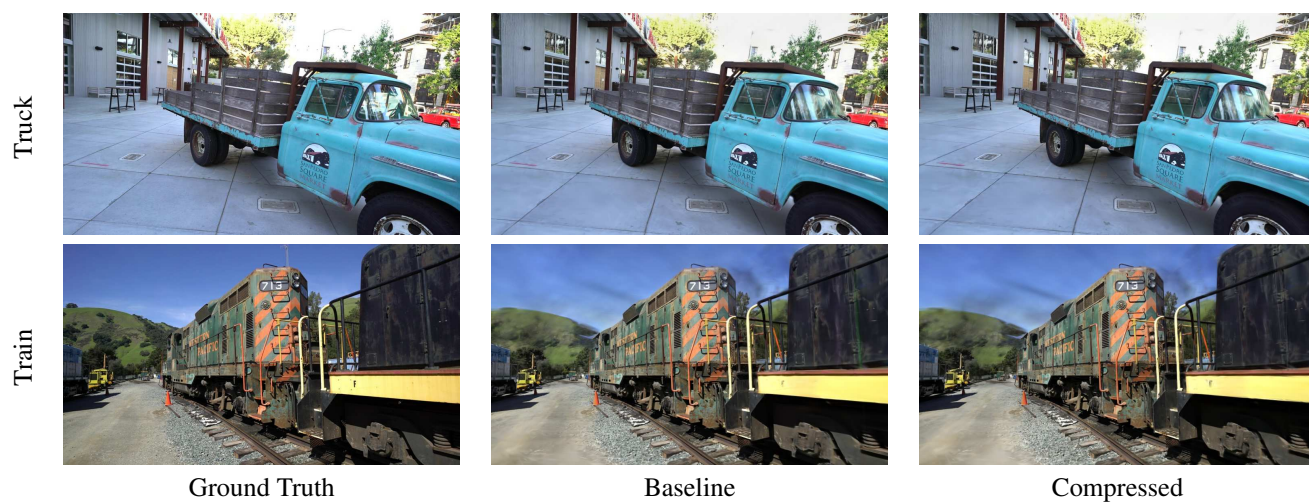

Figure 9. Random test views for each scene from Tanks&Temples [14]

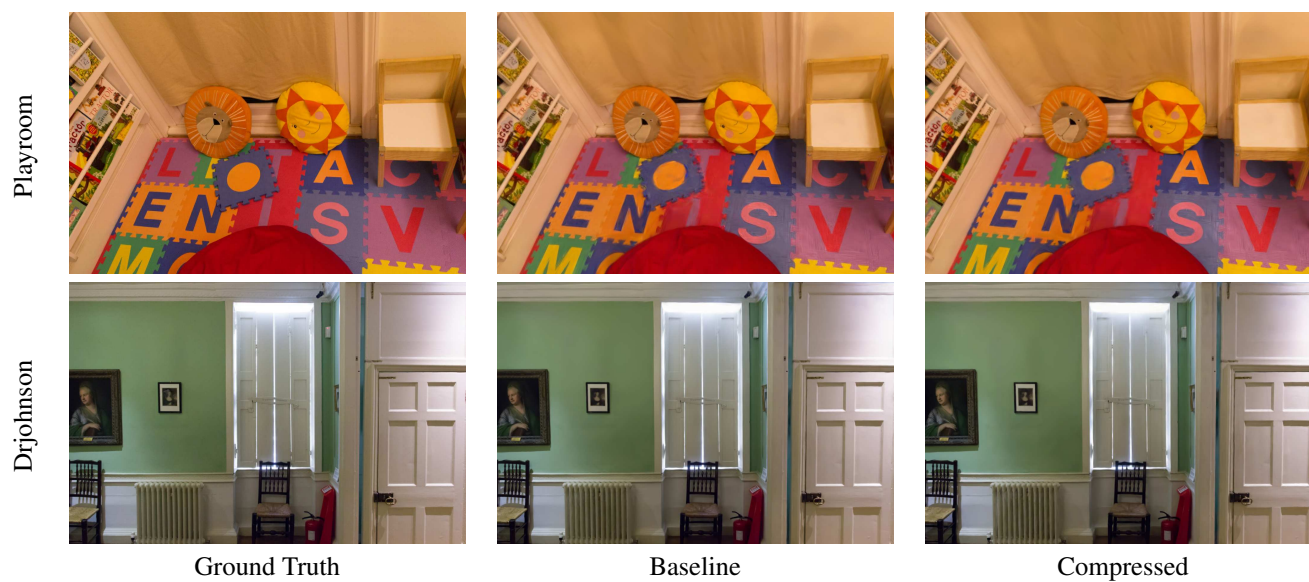

Figure 10. Random test views for each scene from Deep Blending [9]

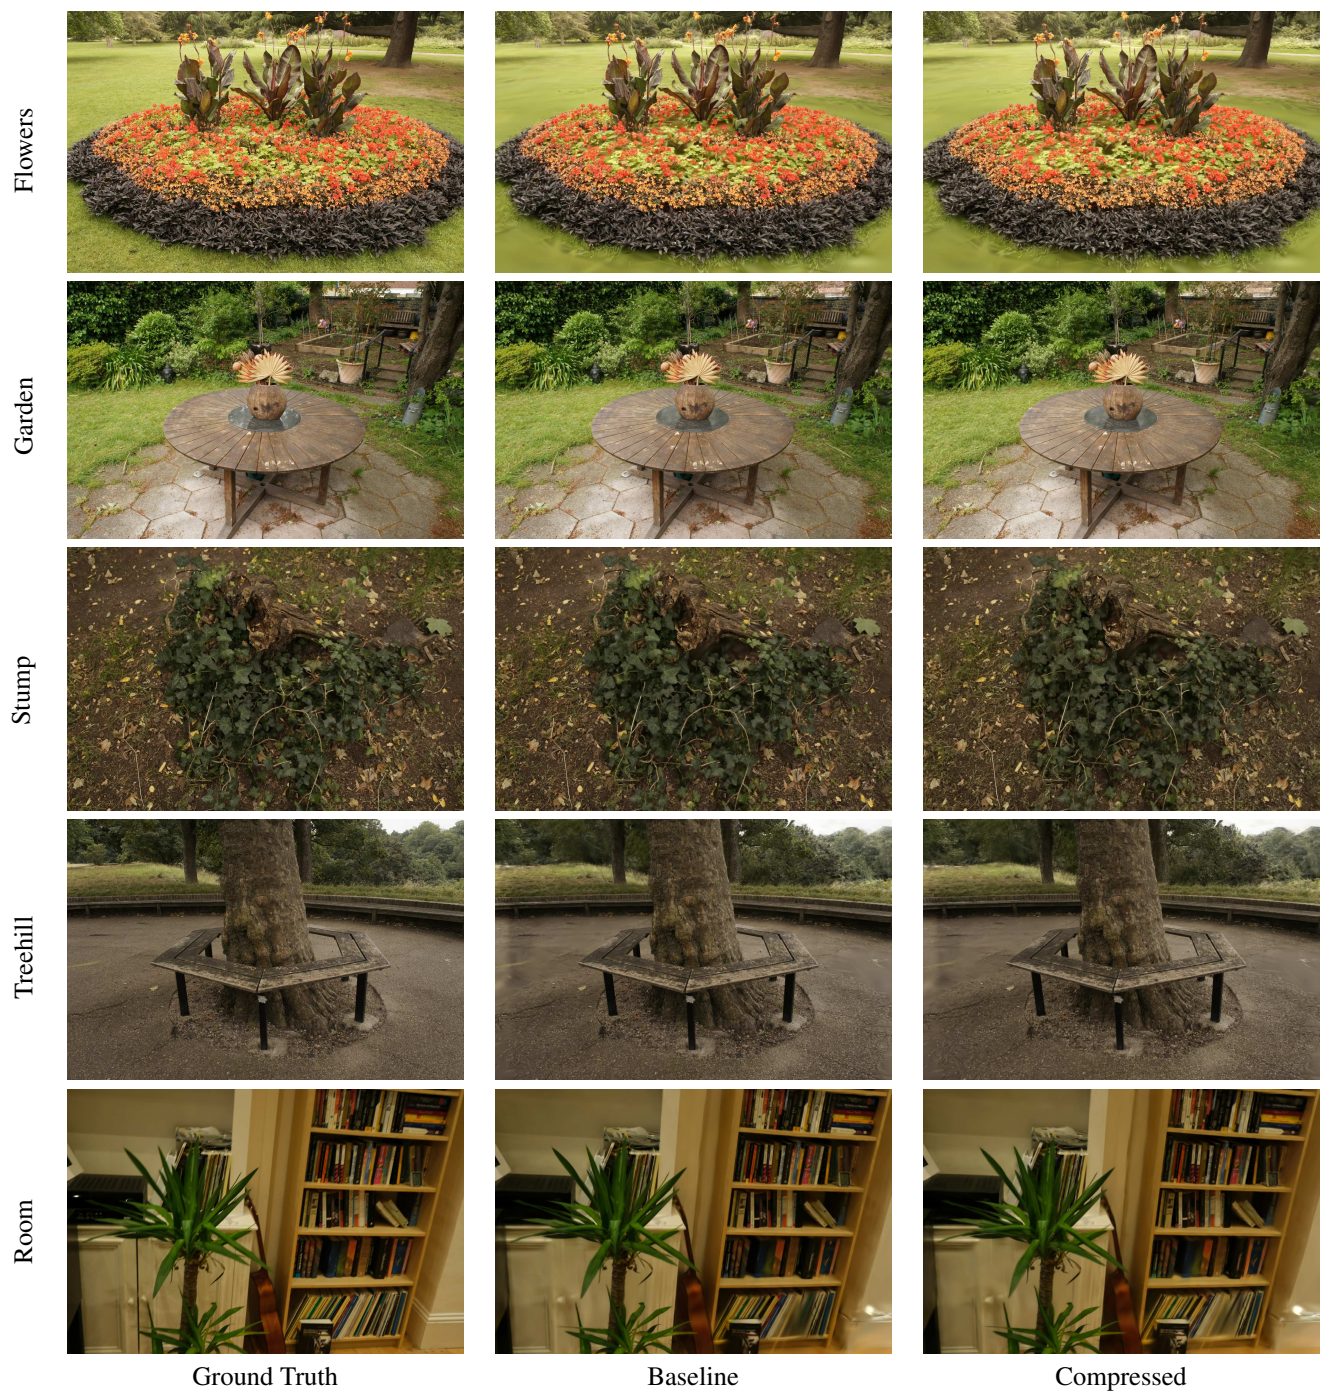

Figure 11. Random test views for each scene from Mip-NeRF360 [2]

Counter

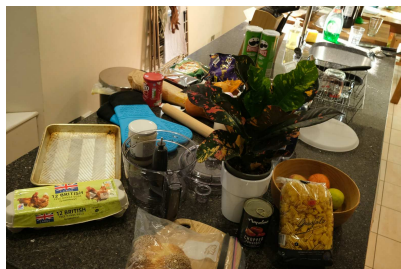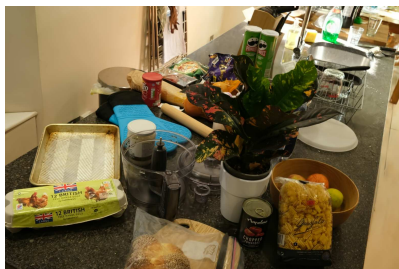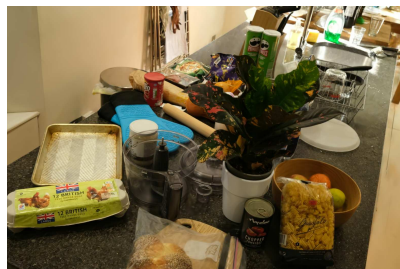

Kitchen

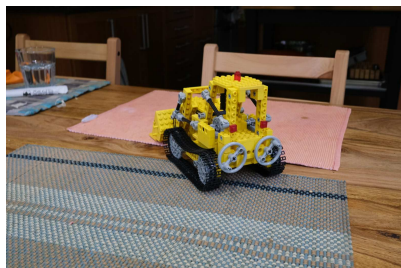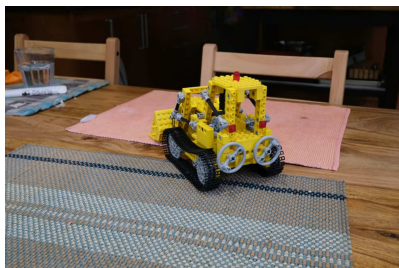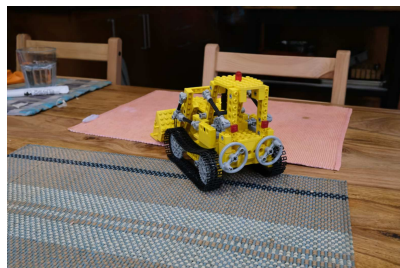

Bonsai

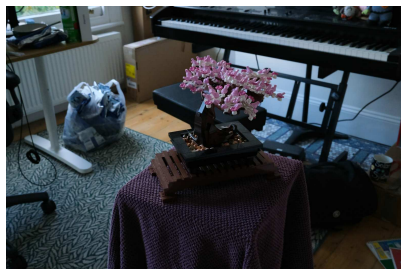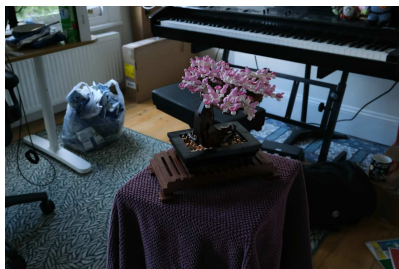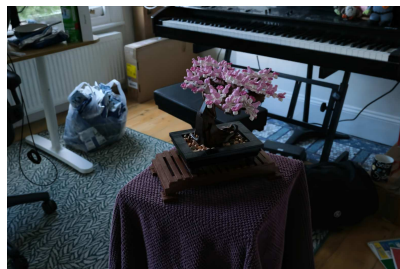

Bicycle

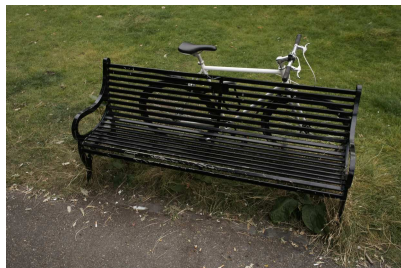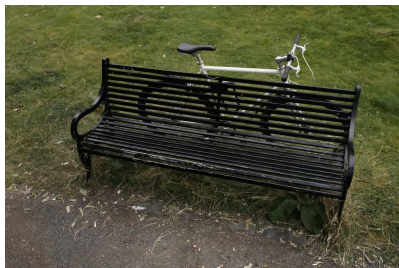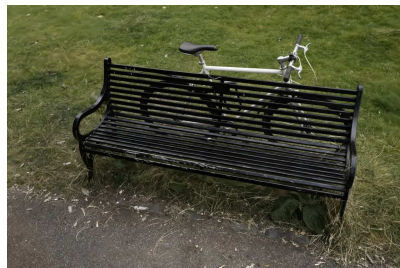

Ground Truth

Baseline

Compressed

Figure 12. Random test views for each scene from Mip-NeRF360 [2]

Chair

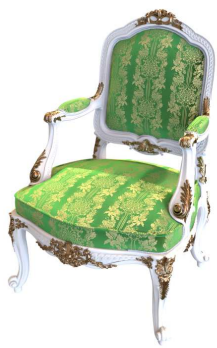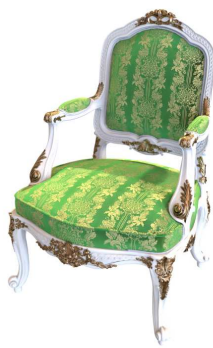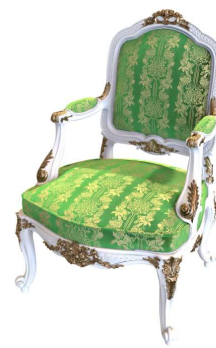

Drums

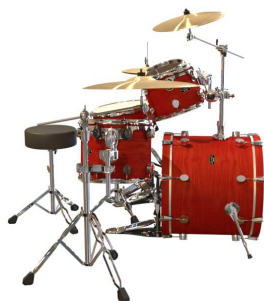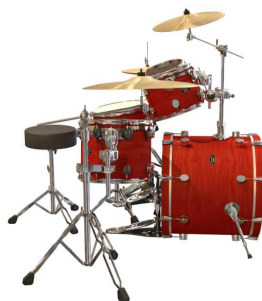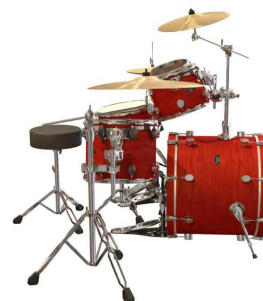

Ficus

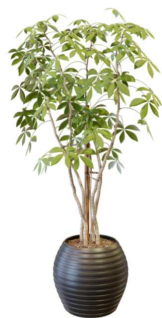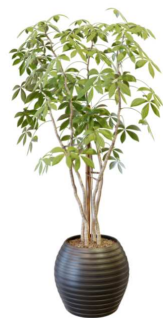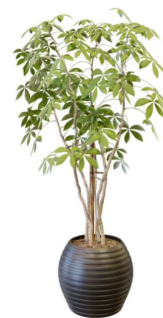

Hotdog

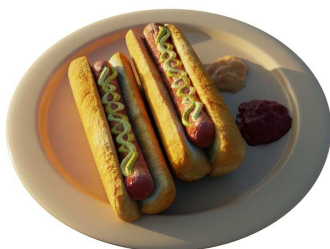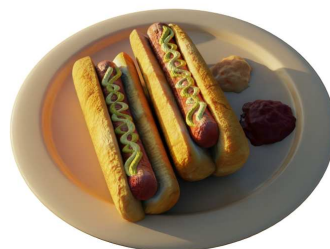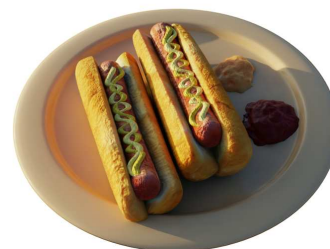

Ground Truth

Baseline

Compressed

Figure 13. Random test views for each scene from NeRF Synthetic [16]

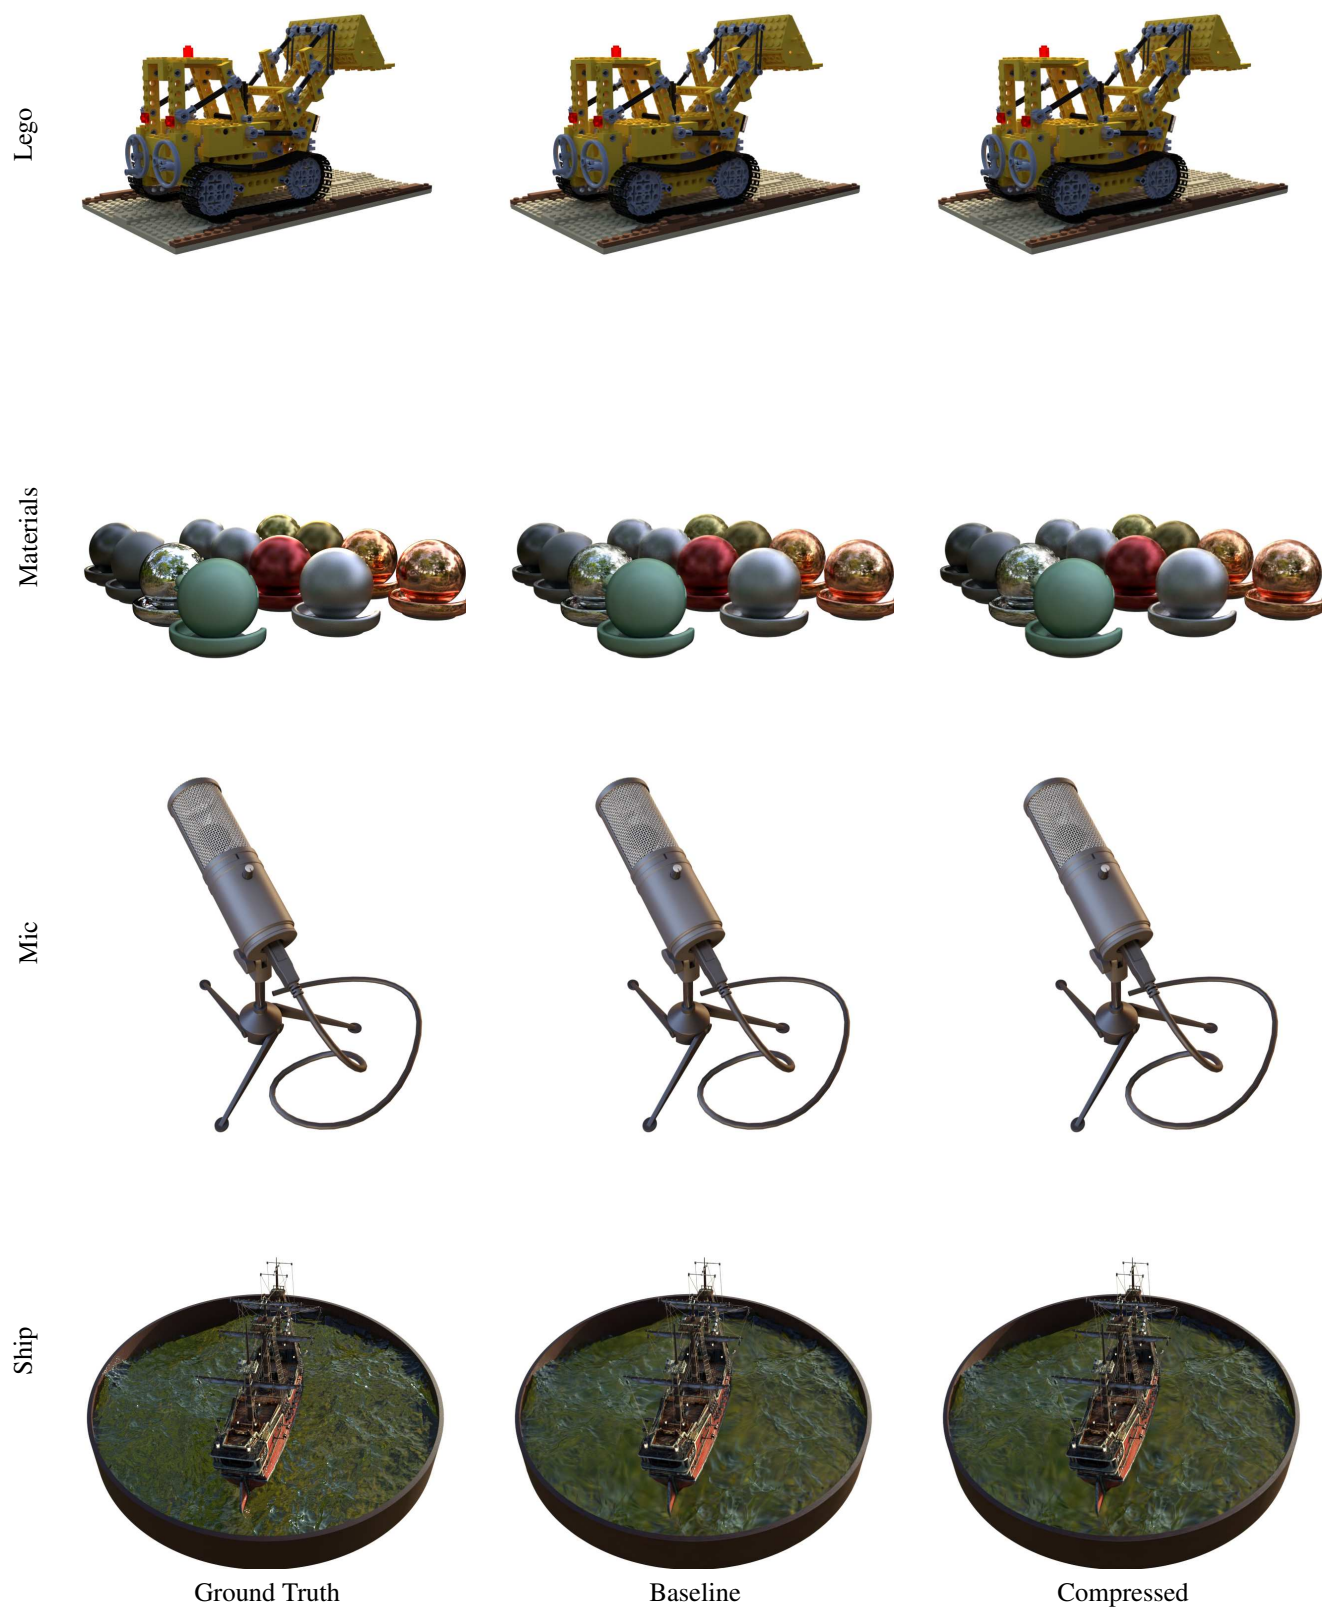

Figure 14. Random test views for each scene from NeRF Synthetic [16]
